# Supplementary material
Source: HighWire-hosted journal article supplement (https://rapm.bmj.com/content/rapm-2021-102588)

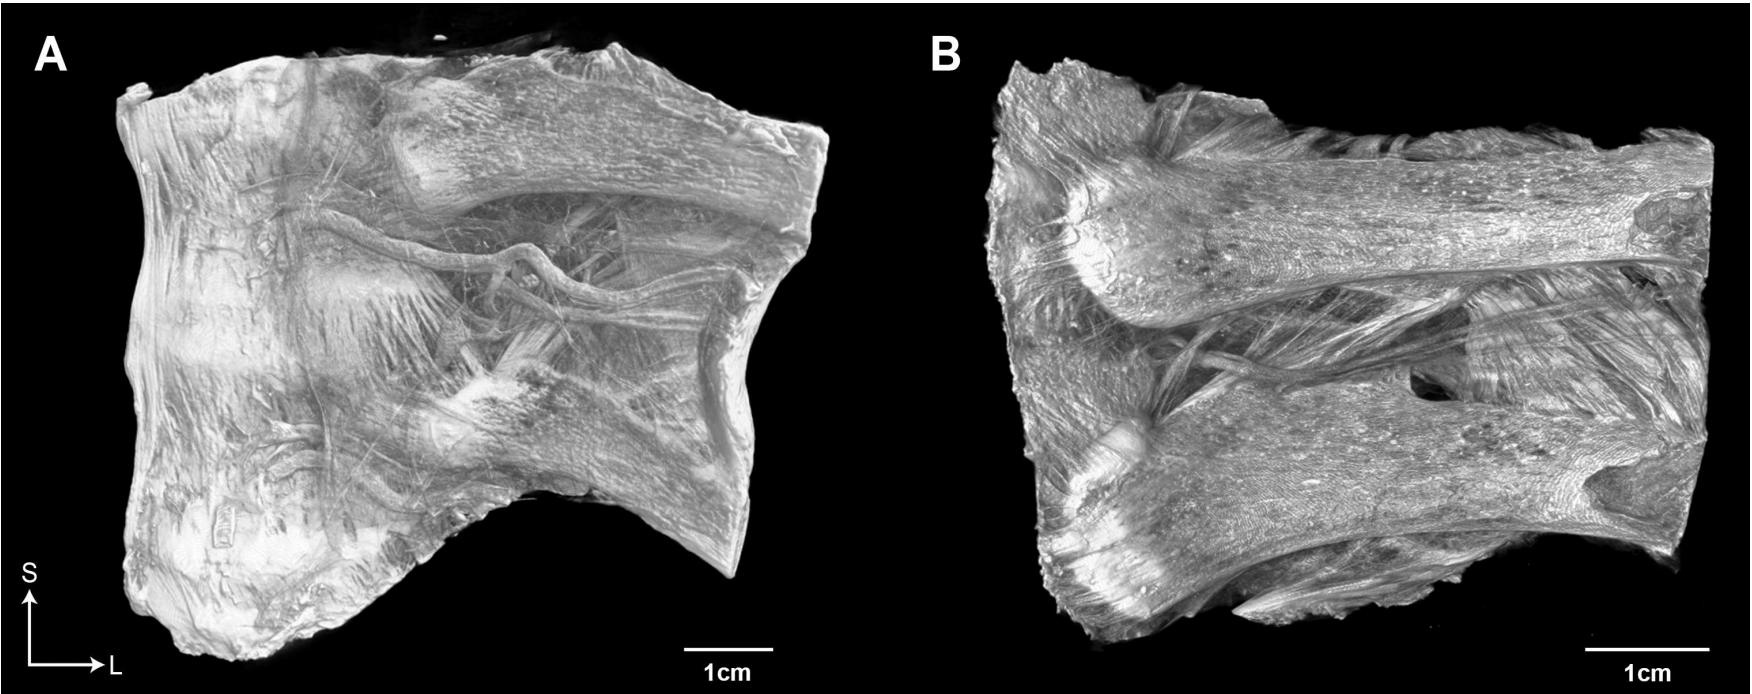

Supplement: inline-supplementary-material-5 [file inline-supplementary-material-5.pdf]

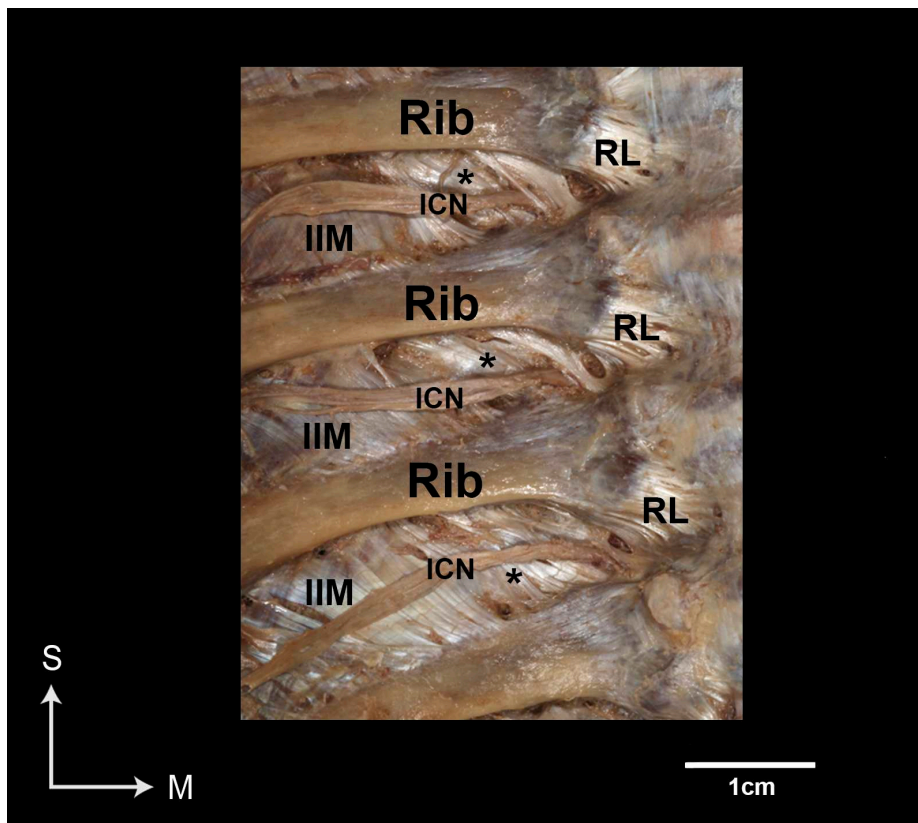

Supplement: inline-supplementary-material-3 [file inline-supplementary-material-3.pdf]

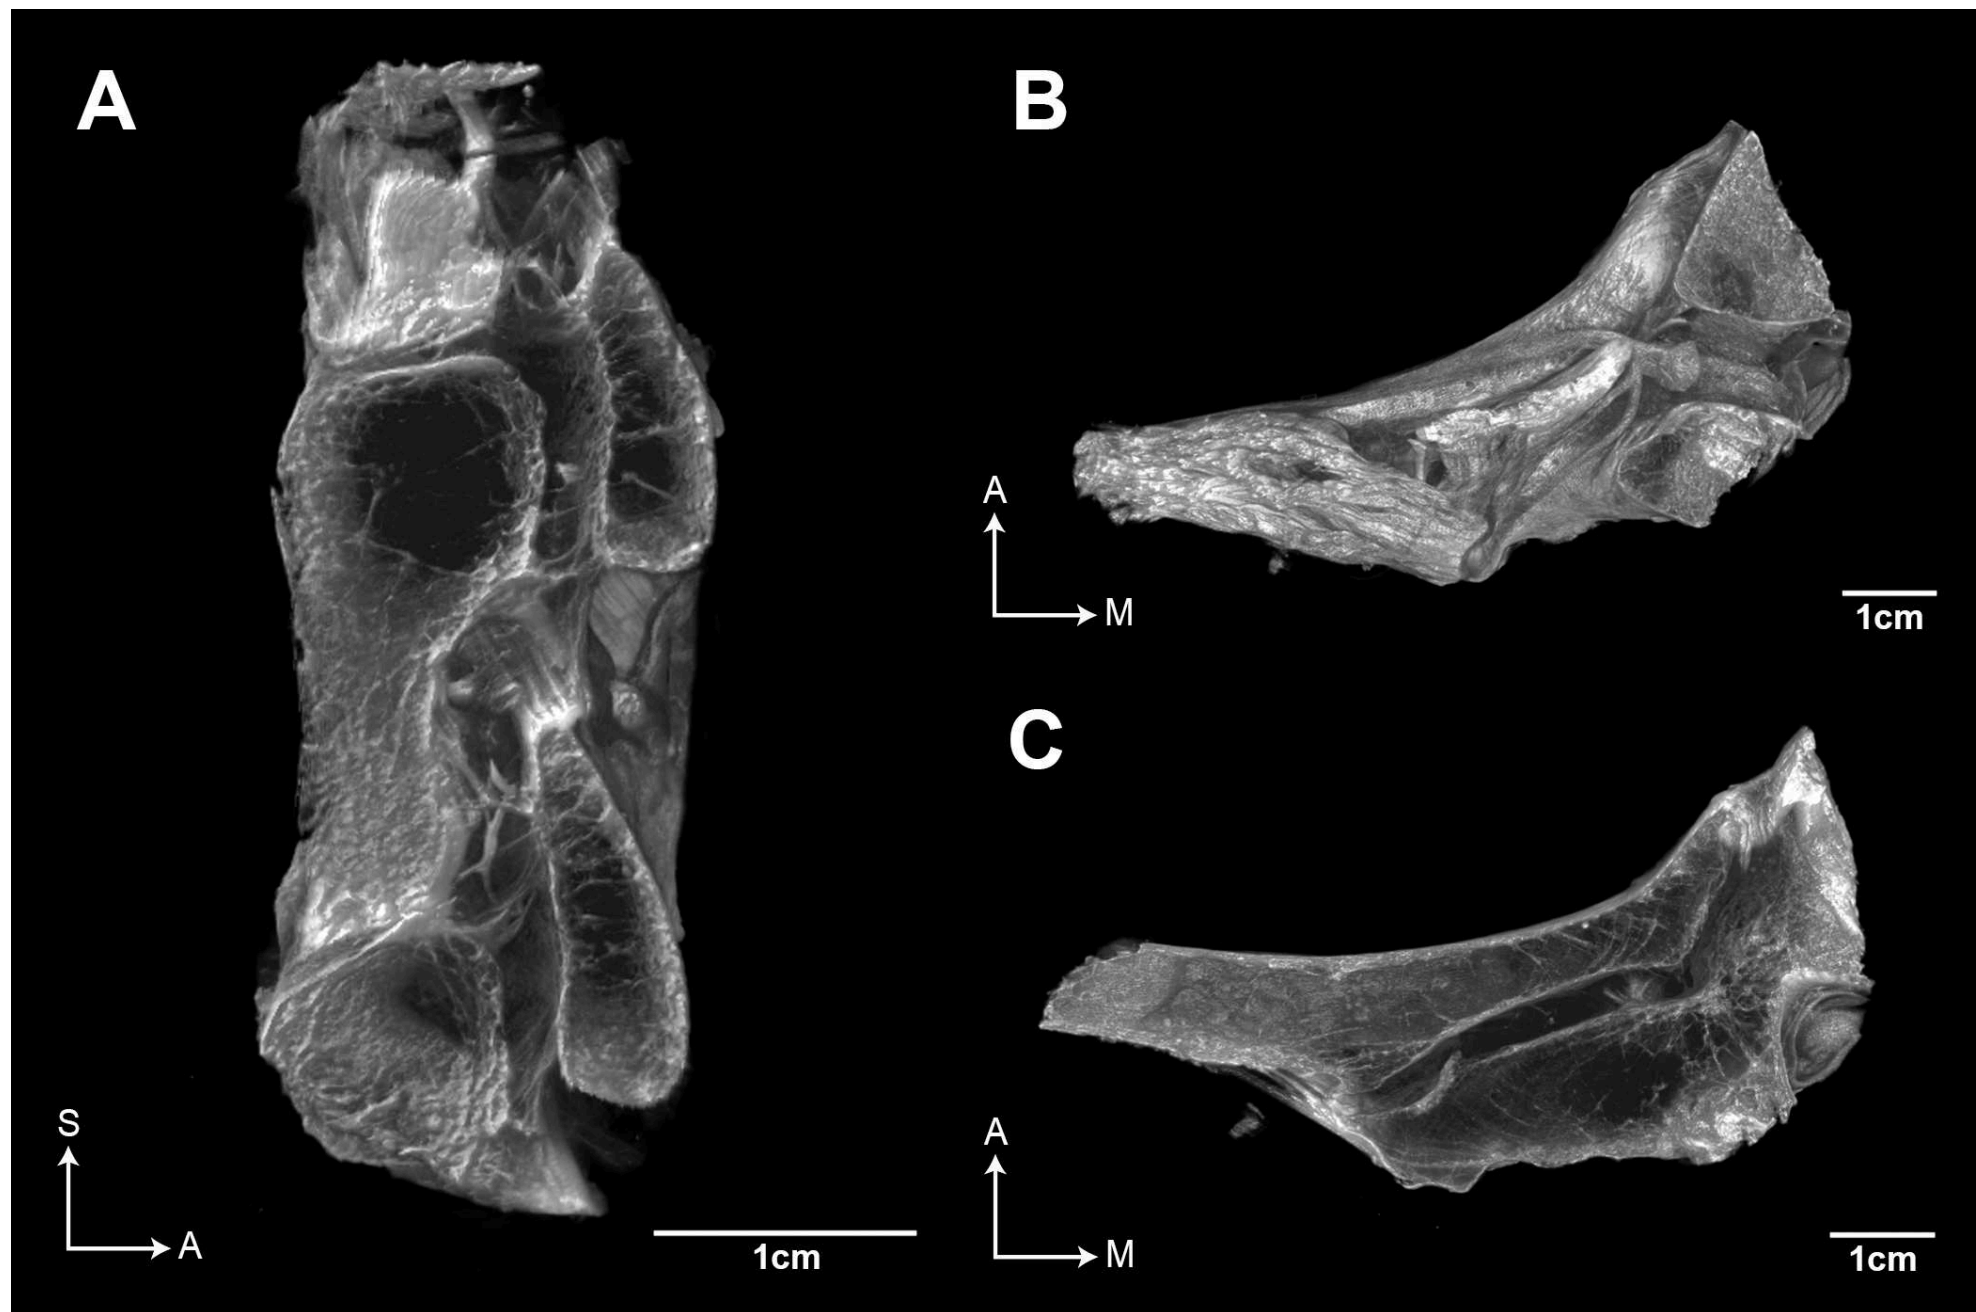

Supplement: inline-supplementary-material-4 [file inline-supplementary-material-4.pdf]

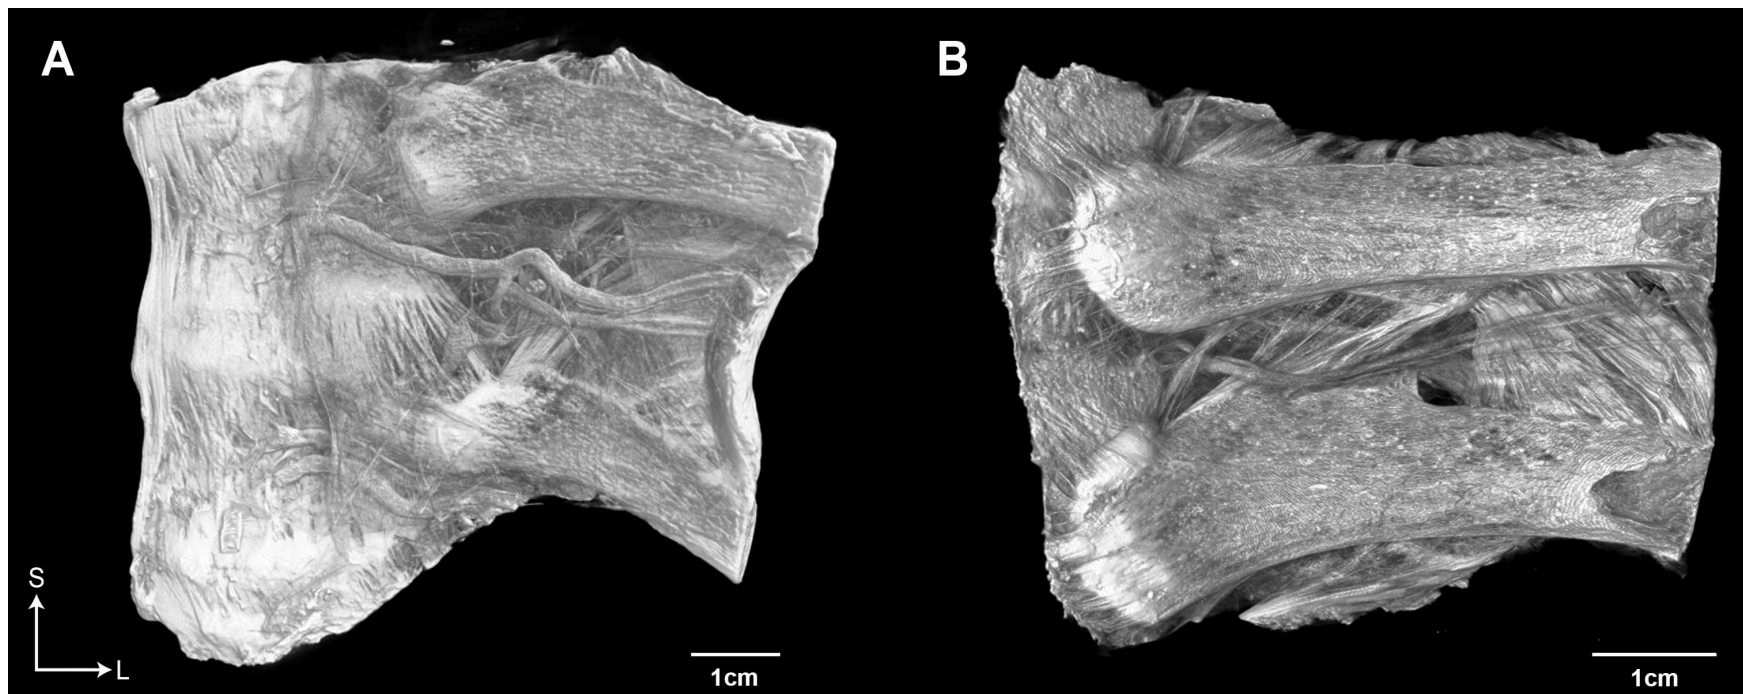

Supplement: inline-supplementary-material-5 [file inline-supplementary-material-5.pdf]

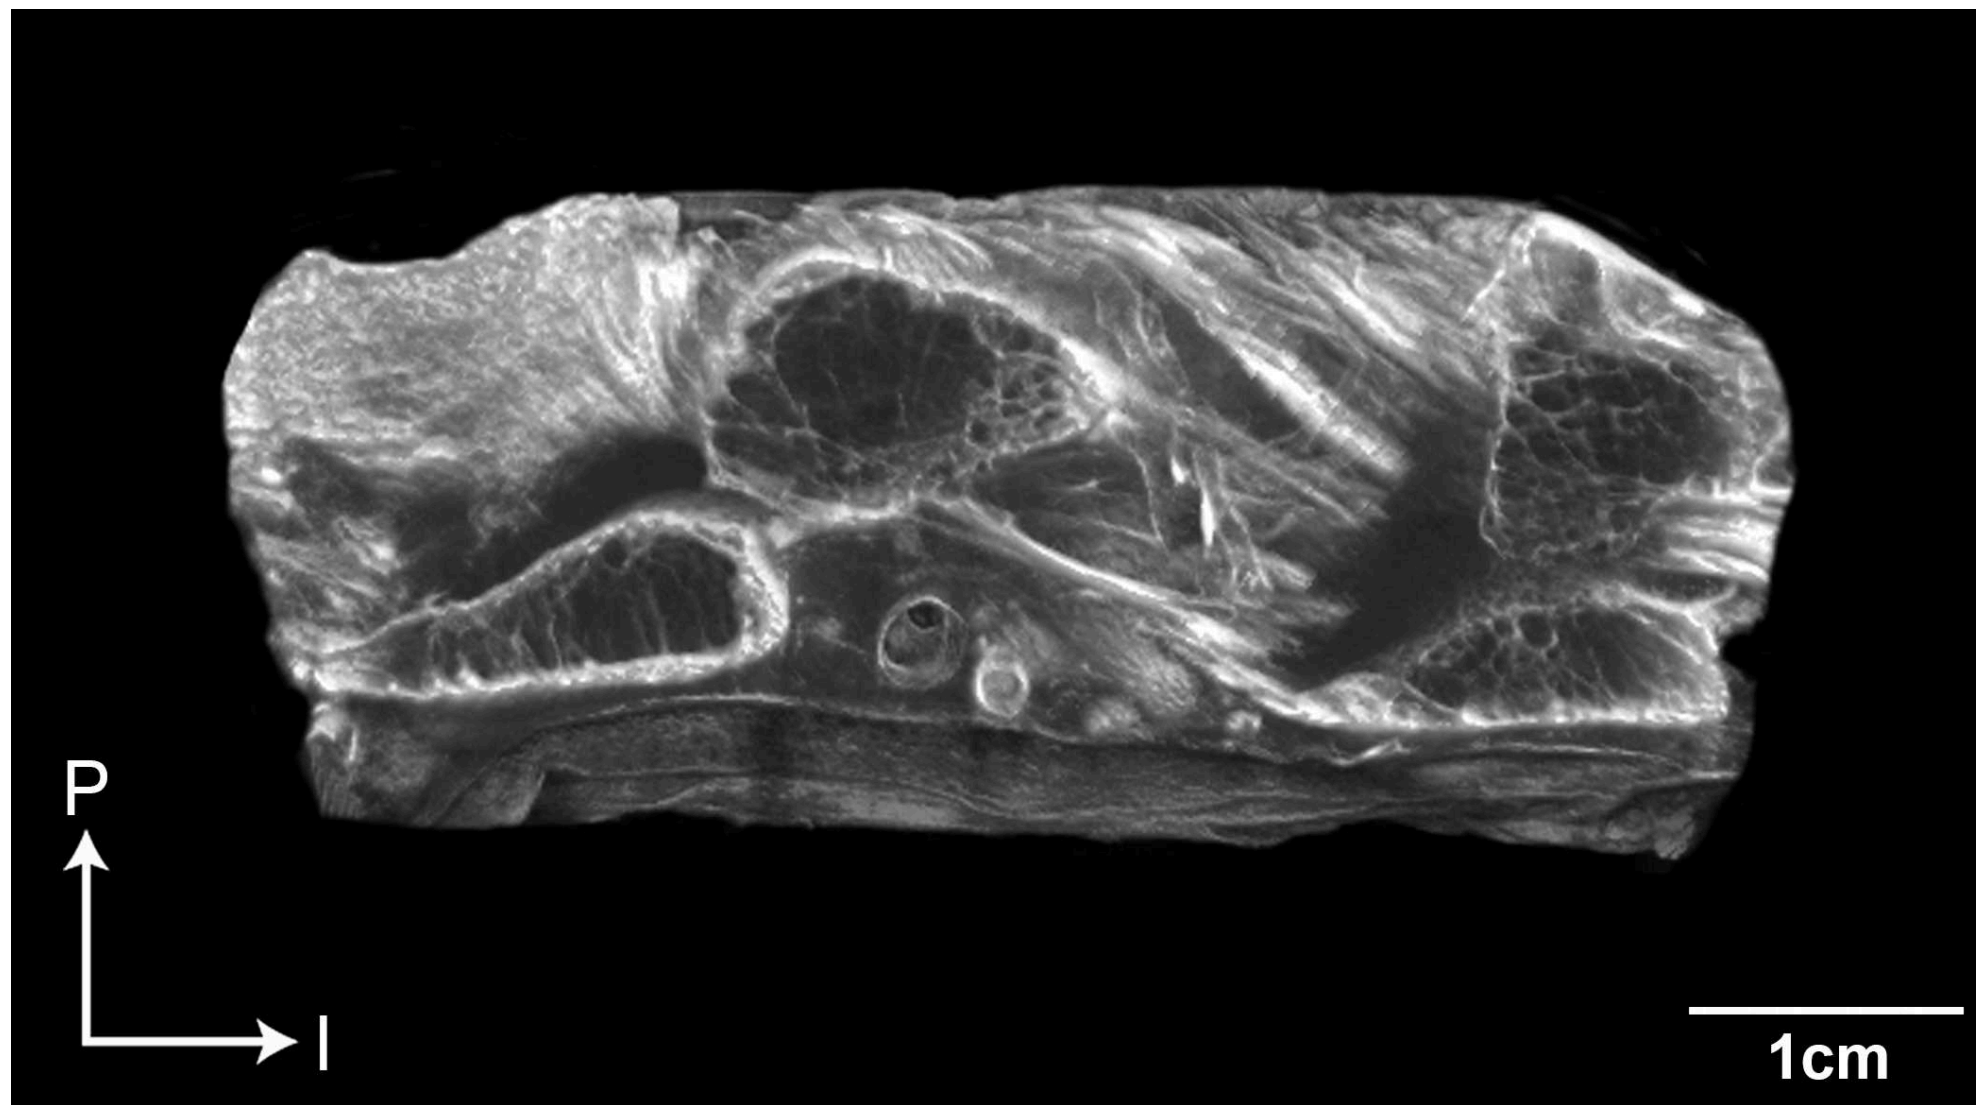

Supplement: inline-supplementary-material-6 [file inline-supplementary-material-6.pdf]

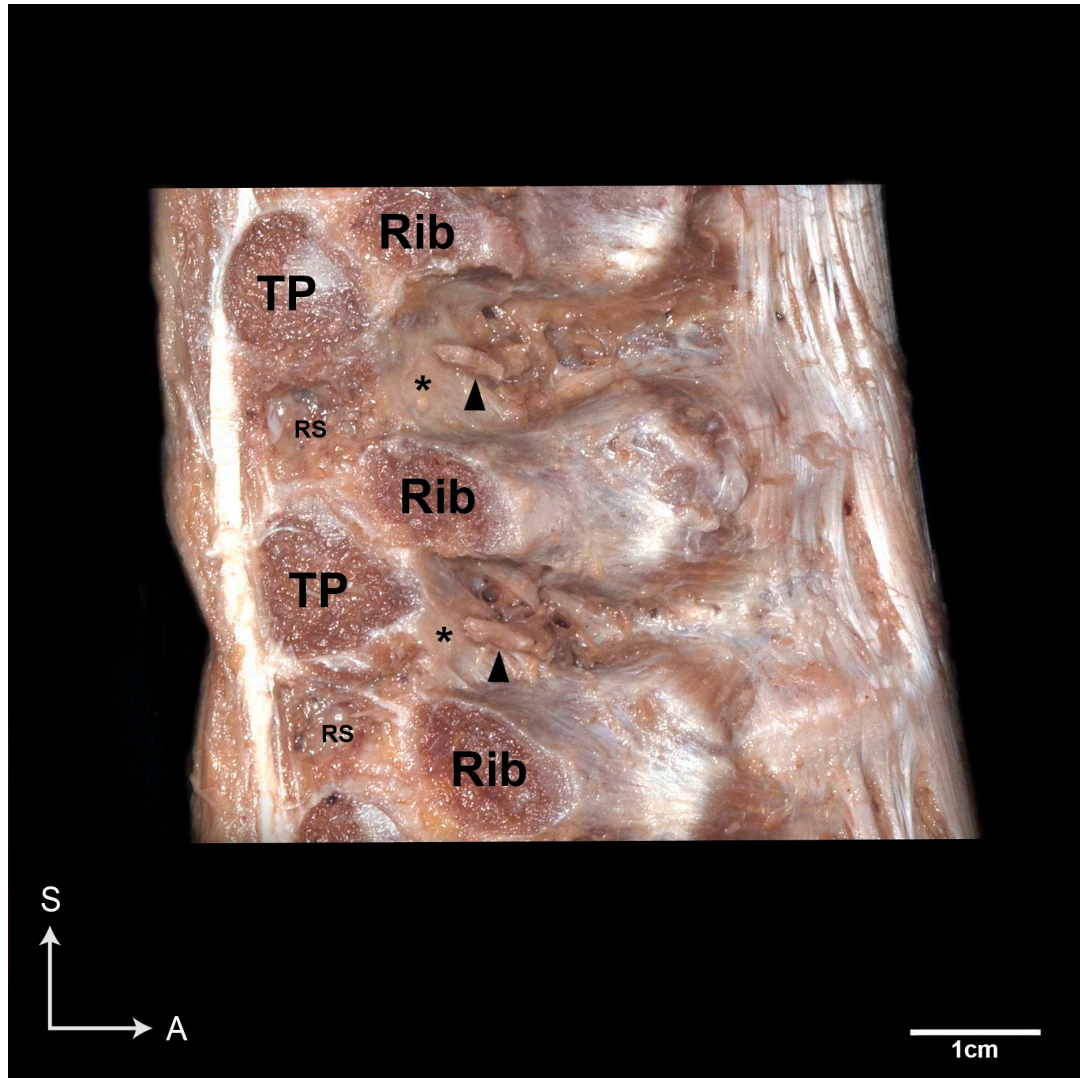

Supplement: inline-supplementary-material-7 [file inline-supplementary-material-7.pdf]
